# Supplementary material for: Degrading permafrost puts Arctic infrastructure at risk by mid-century
Source: PubMed Central journal article supplement (PMC6289964; doi:10.1038/s41467-018-07557-4), 2018-12-11
Supplement: 41467_2018_7557_MOESM1_ESM.pdf [file 41467_2018_7557_MOESM1_ESM.pdf]

# **Degrading permafrost puts Arctic infrastructure at risk by mid-century**

**Jan Hjort<sup>1</sup>, Olli Karjalainen<sup>1</sup>, Juha Aalto<sup>2,3</sup>, Sebastian Westermann<sup>4</sup>, Vladimir E. Romanovsky<sup>5,6</sup>, Frederick E. Nelson<sup>7,8</sup>, Bernd Etzelmüller<sup>4</sup>, Miska Luoto<sup>2</sup>**

<sup>1</sup>*Geography Research Unit, University of Oulu, Oulu, Finland.*

<sup>2</sup>*Department of Geosciences and Geography, University of Helsinki, Helsinki, Finland.*

<sup>3</sup>*Finnish Meteorological Institute, Weather and Climate Change Impact Research, Helsinki, Finland.*

<sup>4</sup>*Department of Geosciences, University of Oslo, Oslo, Norway.*

<sup>5</sup>*Geophysical Institute, University of Alaska Fairbanks, Fairbanks, Alaska, USA.*

<sup>6</sup>*Earth Cryosphere Institute, Tyumen Science Centre, Siberian Branch of the Russian Academy of Science, Tyumen, Russia.*

<sup>7</sup>*Department of Geography, Environment, and Spatial Sciences, Michigan State University, East Lansing, Michigan, USA.*

<sup>8</sup>*Department of Earth, Environmental, and Geographical Sciences, Northern Michigan University, Marquette, Michigan, USA.*

| <b>Table of Contents</b> | <b>Page</b> |
|--------------------------|-------------|
| Supplementary Figures    | 2           |
| Supplementary Tables     | 7           |

## Supplementary Figures

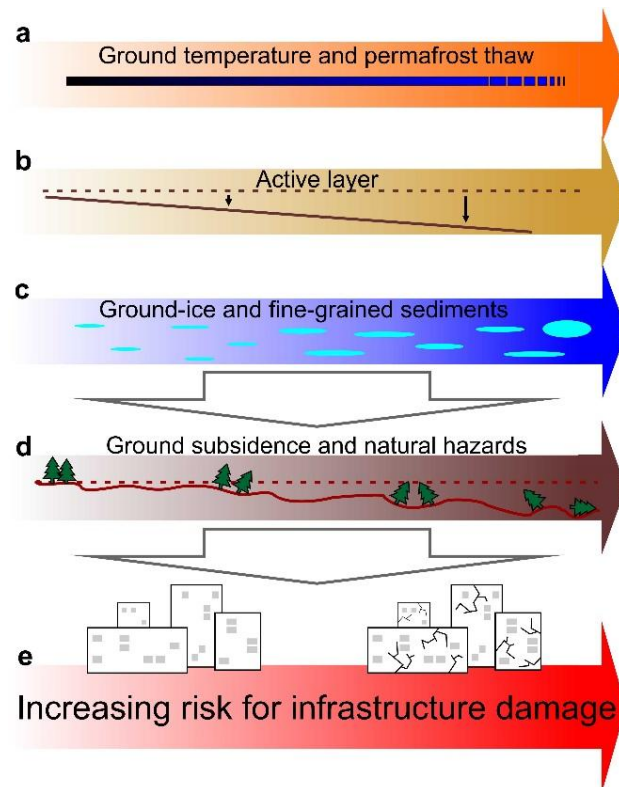

**Supplementary Figure 1. Key environmental factors causing ground instability and infrastructure hazards in the permafrost domain<sup>8,9,13,27</sup>.** Increasing ground temperature (especially above  $-3\text{ }^{\circ}\text{C}$ ) and thaw of near-surface permafrost (a), thickening of active layer (seasonally thawed surface layer atop permafrost) (b), or higher ground-ice and fine-grained sediment content (c) increase ground instability and natural hazards (e.g., ground subsidence and formation of uneven thermokarst terrain) (d), which may lead to loss of structural bearing capacity and damage to human infrastructure (e).

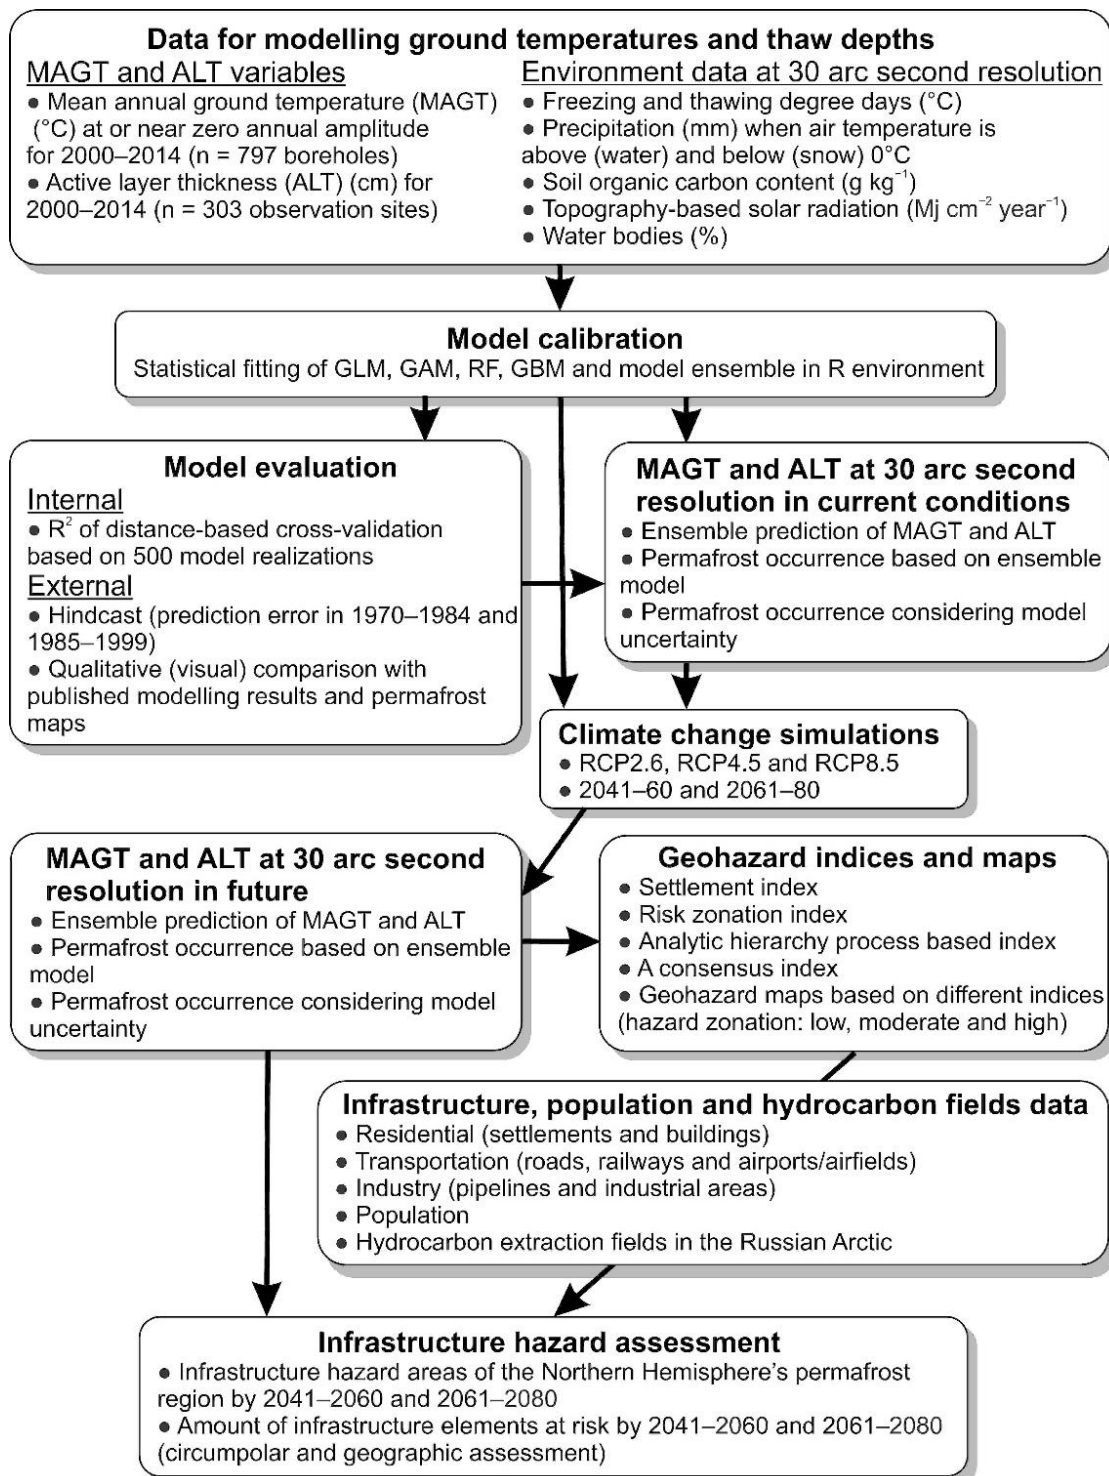

**Supplementary Figure 2. Schematic presentation of the study steps.** Abbreviations: GLM = generalized linear model, GAM = generalized additive model, RF = random forest, GBM = generalized boosting method, RCP = Representative Concentration Pathways<sup>25</sup>.

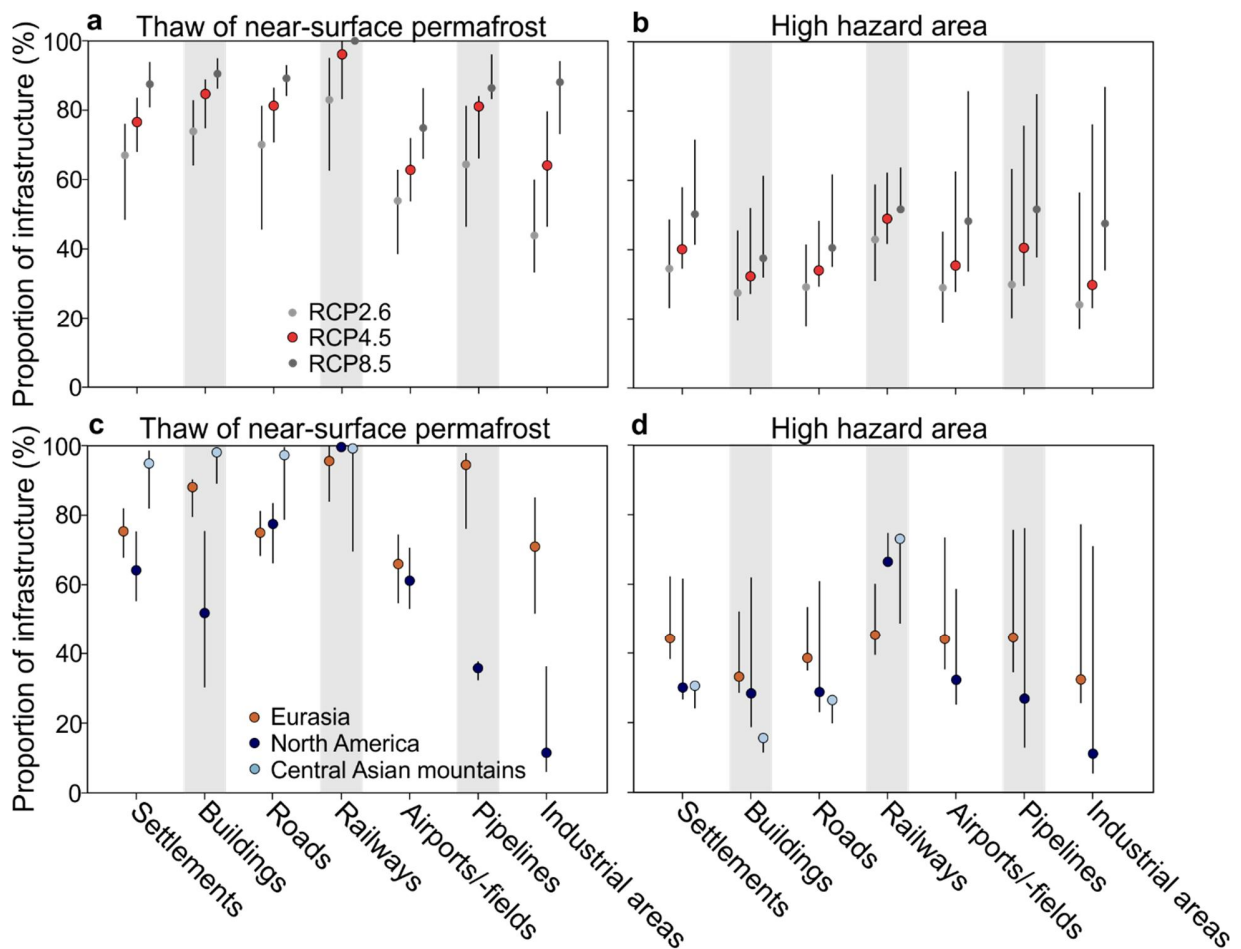

**Supplementary Figure 3. Central results of the infrastructure hazard computations by 2070 (2061–2080).** Proportion of all residential, transportation, and industrial infrastructure in areas of near-surface permafrost thaw (**a**) and high hazard (**b**) in pan-Arctic permafrost area based on different Representative Concentration Pathway (RCP) scenarios. The comparable results of RCP4.5 for geographical sub-regions (Eurasia, North America and central Asian mountains) are presented in **c** and **d** (also 2061–2080; percentages for airports/-field, pipelines, and industrial areas are not shown for central Asian mountains owing to too few observations). The numerical results are presented in Supplementary Table 3. The uncertainty ranges (bars) are based on the uncertainty in the mean annual ground temperature (**a–d**) and active layer thickness predictions (**b** and **d**).

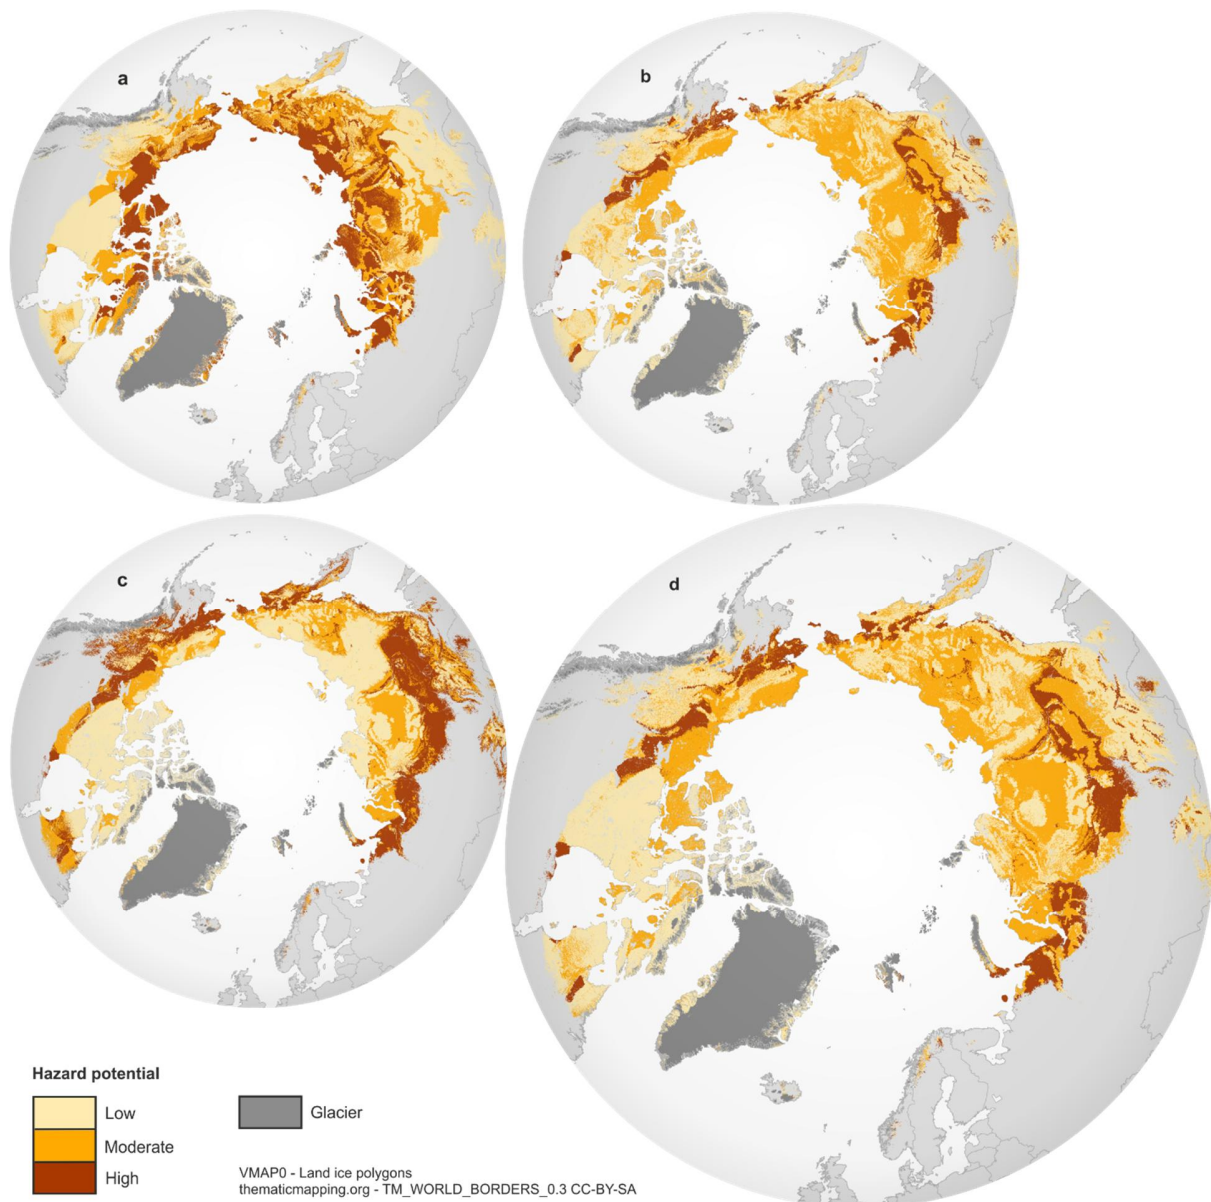

**Supplementary Figure 4. Geohazard indices showing hazard potential by risk level for infrastructure damage by the middle of the century (RCP4.5 2041–2060).** Settlement index (a), risk zonation index (b), analytic hierarchy process-based index (c), and a consensus of the three indices (d) are presented. Note that some of the mid-latitude mountains were excluded to improve the interpretability of the Arctic region. World Borders dataset is from [http://thematicmapping.org/downloads/world\\_borders.php](http://thematicmapping.org/downloads/world_borders.php) and licensed under CC BY-SA 3.0 (<https://creativecommons.org/licenses/by-sa/3.0/>).

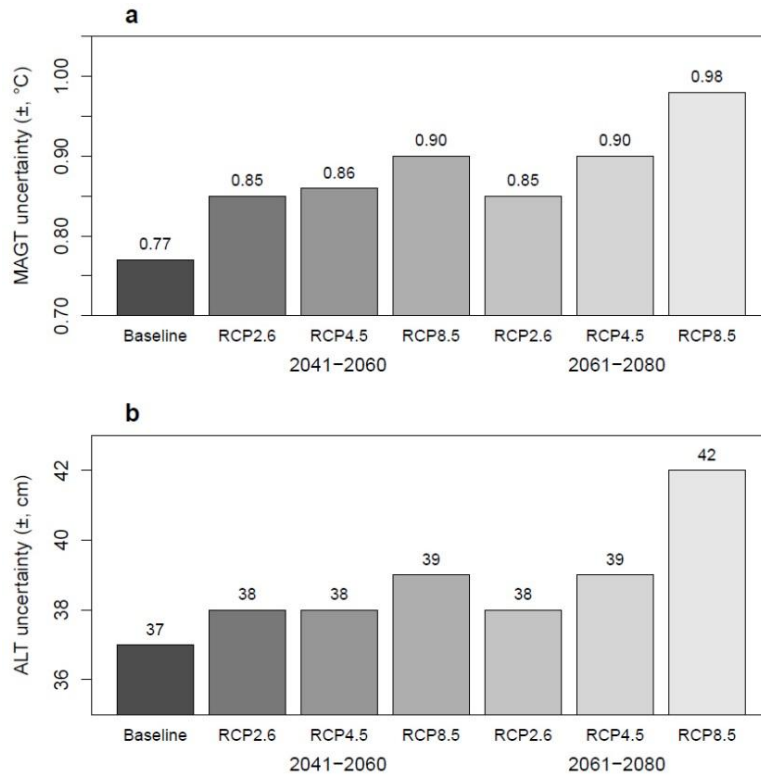

**Supplementary Figure 5. Uncertainty of model predictions.** Uncertainty ranges for predicted mean annual ground temperature (MAGT) **(a)** and active layer thickness (ALT) **(b)** in baseline (2000–2014) and future climate conditions. Uncertainty was assessed by quantifying the variation of 1,000 ensemble predictions at 100,000 randomly chosen grid cells (glaciers masked out), at each time using 70% random sample of MAGT and ALT observations.

## Supplementary Tables

**Supplementary Table 1. Numerical results of the specific study targets.** The results include data for pan-Arctic population (2015), hydrocarbon extraction fields in the Russian Arctic, major pipelines, and central railways for periods 2041–60 and 2061–80 under three Representative Concentration Pathways (RCPs). Proportion (%) and associated uncertainty range of elements at risk in areas of near-surface permafrost thaw and high hazard (determined by a consensus of geohazard indices,  $I_c$ ) appear in brackets. The areal coverage of  $I_c$  is slightly smaller than that of modelled permafrost owing to the patchiness of sediment property data in certain high-Arctic areas<sup>41</sup>.

|                  | Element at risk                      | On permafrost | In thaw area                | In $I_c$ area | In high hazard area         |
|------------------|--------------------------------------|---------------|-----------------------------|---------------|-----------------------------|
| RCP2.6 2041–2060 | Population                           | 4,906,854     | 3,093,472 (63.0, 33.3-82.7) | 4,567,438     | 721,308 (15.8, 9.3-30.4)    |
|                  | Oil/Gas fields in the Russian Arctic | 84,170        | 61,298 (72.8, 51.5-82.5)    | 83,870        | 35,143 (41.9, 31.9-71.2)    |
|                  | TAPS (Prudhoe Bay-Valdez)            | 914           | 492 (53.9, 30.5-63.9)       | 913           | 291 (31.9, 20.9-57.2)       |
|                  | Yamal-Nenets gas pipelines           | 1,341         | 1,182 (88.2, 54.6-100)      | 1,341         | 593 (44.3, 23.5-80.7)       |
|                  | ESPO (Tayshet-Kozmino)               | 1,600         | 1,554 (97.2, 85.6-100)      | 1,600         | 733 (45.8, 43.6-46.6)       |
|                  | Qinghai-Tibet railway (Lhasa-Xining) | 510           | 412 (80.9, 20.6-99.6)       | 479           | 379 (79.1, 20.1-99.0)       |
|                  | Obstkaya-Bovanenkovo railway         | 563           | 245 (43.4, 8.4-56.8)        | 563           | 176 (31.2, 5.8-76.0)        |
| RCP4.5 2041–2060 | Population                           | 4,906,854     | 3,612,746 (73.6, 46.3-87.3) | 4,567,438     | 944,995 (20.7, 12.4-33.4)   |
|                  | Oil/Gas fields in the Russian Arctic | 84,170        | 64,560 (76.7, 61.1-85.4)    | 83,870        | 38,004 (45.3, 34.9-77.9)    |
|                  | TAPS (Prudhoe Bay-Valdez)            | 914           | 555 (60.7, 44.8-66.2)       | 913           | 293 (32.1, 29.1-66.7)       |
|                  | Yamal-Nenets gas pipelines           | 1,341         | 1,262 (94.1, 69.7-100)      | 1,341         | 673 (50.2, 29.5-92.8)       |
|                  | ESPO (Tayshet-Kozmino)               | 1,600         | 1,586 (99.1, 93.8-100)      | 1,600         | 733 (45.8, 45.8-46.6)       |
|                  | Qinghai-Tibet railway (Lhasa-Xining) | 510           | 473 (92.9, 36.6-99.8)       | 479           | 438 (91.4, 34.6-99.5)       |
|                  | Obstkaya-Bovanenkovo railway         | 563           | 277 (49.2, 18.7-81.8)       | 563           | 209 (37.1, 13.5-91.0)       |
| RCP8.5 2041–2060 | Population                           | 4,906,854     | 4,120,106 (84.0, 65.5-92.5) | 4,567,438     | 1,061,324 (23.2, 19.7-37.2) |
|                  | Oil/Gas fields in the Russian Arctic | 84,170        | 73,070 (86.8, 76.1-94.1)    | 83,870        | 48,143 (57.4, 44.4-84.0)    |
|                  | TAPS (Prudhoe Bay-Valdez)            | 914           | 589 (64.5, 56.6-69.7)       | 913           | 314 (34.4, 31.7-76.4)       |
|                  | Yamal-Nenets gas pipelines           | 1,341         | 1,341 (100, 90.2-100)       | 1,341         | 752 (56.1, 45.7-100)        |
|                  | ESPO (Tayshet-Kozmino)               | 1,600         | 1,600 (100, 98.1-100)       | 1,600         | 733 (45.8, 45.8-46.6)       |
|                  | Qinghai-Tibet railway (Lhasa-Xining) | 510           | 506 (99.3, 66.8-100)        | 479           | 470 (98.0, 64.5-99.9)       |
|                  | Obstkaya-Bovanenkovo railway         | 563           | 422 (74.9, 45.3-100)        | 563           | 406 (72.1, 32.9-100)        |
| RCP2.6 2061–2080 | Population                           | 4,906,854     | 3,134,647 (63.9, 34.1-83.3) | 4,567,438     | 765,476 (16.8, 9.9-31.1)    |
|                  | Oil/Gas fields in the Russian Arctic | 84,170        | 62,281 (74.0, 55.6-83.4)    | 83,870        | 35,901 (42.8, 33-76.5)      |
|                  | TAPS (Prudhoe Bay-Valdez)            | 914           | 523 (57.3, 36.5-64.8)       | 913           | 292 (31.9, 24.3-62.4)       |
|                  | Yamal-Nenets gas pipelines           | 1,341         | 1,188 (88.6, 59.1-100)      | 1,341         | 599 (44.7, 24.4-87.0)       |
|                  | ESPO (Tayshet-Kozmino)               | 1,600         | 1,559 (97.5, 88.1-100)      | 1,600         | 733 (45.8, 44.8-46.6)       |
|                  | Qinghai-Tibet railway (Lhasa-Xining) | 510           | 411 (80.8, 19.4-99.6)       | 479           | 378 (79.0, 19.1-99.0)       |
|                  | Obstkaya-Bovanenkovo railway         | 563           | 251 (44.5, 9.7-58.5)        | 563           | 183 (32.4, 6.7-77.4)        |
| RCP4.5 2061–2080 | Population                           | 4,906,854     | 4,108,172 (83.7, 64.8-92.1) | 4,567,438     | 1,052,540 (23.0, 19.4-36.9) |
|                  | Oil/Gas fields in the Russian Arctic | 84,170        | 72,037 (85.6, 74.0-92.6)    | 83,870        | 47,162 (56.2, 42.3-83.0)    |
|                  | TAPS (Prudhoe Bay-Valdez)            | 914           | 589 (64.5, 56.3-68.5)       | 913           | 318 (34.8, 31.7-74.7)       |
|                  | Yamal-Nenets gas pipelines           | 1,341         | 1,341 (100, 86.5-100)       | 1,341         | 752 (56.1, 42.1-100)        |
|                  | ESPO (Tayshet-Kozmino)               | 1,600         | 1,600 (100, 98.0-100)       | 1,600         | 733 (45.8, 45.8-46.6)       |
|                  | Qinghai-Tibet railway (Lhasa-Xining) | 510           | 506 (99.3, 67.3-100)        | 479           | 470 (98.0, 64.8-99.9)       |
|                  | Obstkaya-Bovanenkovo railway         | 563           | 379 (67.2, 43.6-100)        | 563           | 373 (66.3, 31.2-100)        |
| RCP8.5 2061–2080 | Population                           | 4,906,854     | 4,634,539 (94.5, 86.8-97.1) | 4,567,438     | 1,287,285 (28.2, 23.6-43.7) |
|                  | Oil/Gas fields in the Russian Arctic | 84,170        | 83,832 (99.6, 92.4-100)     | 83,870        | 57,350 (68.4, 60.2-91.4)    |
|                  | TAPS (Prudhoe Bay-Valdez)            | 914           | 696 (76.2, 66.6-97.2)       | 913           | 496 (54.3, 31.7-97.9)       |
|                  | Yamal-Nenets gas pipelines           | 1,341         | 1,341 (100, 100-100)        | 1,341         | 752 (56.1, 55.5-100)        |
|                  | ESPO (Tayshet-Kozmino)               | 1,600         | 1,600 (100, 100-100)        | 1,600         | 741 (46.3, 45.8-49.1)       |
|                  | Qinghai-Tibet railway (Lhasa-Xining) | 510           | 510 (100, 96.5-100)         | 479           | 473 (98.8, 95.0-99.9)       |
|                  | Obstkaya-Bovanenkovo railway         | 563           | 563 (100, 100-100)          | 563           | 495 (87.8, 87.1-100)        |

TAPS = Trans-Alaska Pipeline System; ESPO = Eastern Siberia–Pacific Ocean pipeline  
 Oil/Gas fields = km<sup>2</sup>; pipelines and railways = km

**Supplementary Table 2. Numerical results of the infrastructure computations for periods 2041–60 and 2061–80 under three Representative Concentration Pathways (RCPs).** Results are shown for the entire pan-Arctic permafrost area (Arctic) and its extracted subsets of Eurasia, North America, and central Asian mountains (Mountains). Proportion (%) of infrastructure in areas of near-surface permafrost thaw and high hazard (determined by a consensus of geohazard indices) appear in brackets.

| Infrastructure          | Thaw                 |                |               |               |                    | High hazard   |               |              |  |
|-------------------------|----------------------|----------------|---------------|---------------|--------------------|---------------|---------------|--------------|--|
|                         | Arctic               | Eurasia        | North-America | Mountains     | Arctic             | Eurasia       | North-America | Mountains    |  |
| <b>RCP2.6 2041–2060</b> |                      |                |               |               |                    |               |               |              |  |
| Settl./>5,000 inh.      | 1,155/39 (66.0/78.0) | 755 (63.9)     | 162 (55.3)    | 238 (85.9)    | 556/22 (33.7/44.0) | 427 (36.6)    | 70 (26.3)     | 59 (27.3)    |  |
| Buildings               | 90,766 (72.4)        | 83,943 (76.3)  | 3,904 (32.1)  | 2,919 (92.4)  | 32,221 (26.2)      | 29,883 (27.4) | 1,965 (18.4)  | 373 (12.5)   |  |
| Roads                   | 30,202 (68.6)        | 15,854 (61.8)  | 4,395 (65.0)  | 9,952 (85.9)  | 12,119 (28.4)      | 8,229 (32.1)  | 1,541 (23.1)  | 2,348 (22.6) |  |
| Railways                | 5,728 (82.4)         | 4,806 (81.3)   | 340 (99.4)    | 581 (83.0)    | 2,956 (42.7)       | 2,335 (39.5)  | 227 (66.3)    | 394 (59.0)   |  |
| Airports                | 198 (51.8)           | 52 (49.1)      | 144 (52.7)    | 2 (66.7)      | 99 (27.7)          | 33 (32.4)     | 66 (26.0)     | 0 (0)        |  |
| Pipelines               | 5,921 (62.4)         | 5,234 (71.8)   | 686 (31.3)    | 1 (100)       | 2,703 (28.6)       | 2,422 (33.3)  | 282 (13.0)    | 0 (0)        |  |
| Industrial areas        | 81.5 (42.0)          | 79.5 (46.5)    | 1.5 (6.6)     | 0.5 (53.4)    | 44.9 (23.9)        | 43.6 (26.2)   | 1.3 (6.4)     | <0.1 (0.1)   |  |
| <b>RCP4.5 2041–2060</b> |                      |                |               |               |                    |               |               |              |  |
| Settl./>5,000 inh.      | 1,246/39 (71.2/78.0) | 813 (68.8)     | 177 (60.4)    | 256 (92.4)    | 608/22 (36.9/44.0) | 465 (39.8)    | 77 (28.9)     | 66 (30.6)    |  |
| Buildings               | 95,581 (76.3)        | 88,017 (80.0)  | 4,509 (37.1)  | 3,055 (96.7)  | 36,094 (29.4)      | 33,573 (30.7) | 2,065 (19.3)  | 456 (15.3)   |  |
| Roads                   | 33,366 (75.8)        | 17,754 (69.2)  | 4,902 (72.5)  | 10,710 (92.4) | 13,584 (31.8)      | 9,176 (35.8)  | 1,765 (26.4)  | 2,643 (25.4) |  |
| Railways                | 6,077 (87.4)         | 5,080 (85.9)   | 341 (99.5)    | 656 (93.7)    | 3,100 (44.8)       | 2,417 (40.9)  | 227 (66.5)    | 456 (68.3)   |  |
| Airports                | 220 (57.6)           | 60 (56.6)      | 157 (57.5)    | 3 (100)       | 111 (31.0)         | 38 (37.3)     | 73 (28.7)     | 0 (0)        |  |
| Pipelines               | 6,560 (69.2)         | 5,808 (79.6)   | 752 (34.3)    | 1 (100)       | 3,055 (32.4)       | 2,767 (38.1)  | 288 (13.3)    | 0 (0)        |  |
| Industrial areas        | 93.6 (48.2)          | 91.1 (53.3)    | 1.9 (8.6)     | 0.5 (53.4)    | 46.6 (24.8)        | 44.9 (27.1)   | 1.7 (7.9)     | <0.1 (0.1)   |  |
| <b>RCP8.5 2041–2060</b> |                      |                |               |               |                    |               |               |              |  |
| Settl./>5,000 inh.      | 1,351/44 (77.2/88.0) | 897 (76.0)     | 191 (65.2)    | 263 (94.9)    | 665/23 (40.3/46.0) | 518 (44.4)    | 81 (30.5)     | 66 (30.6)    |  |
| Buildings               | 106,748 (85.2)       | 96,991 (88.2)  | 6,657 (54.8)  | 3,100 (98.2)  | 39,840 (32.4)      | 36,339 (33.3) | 3,037 (28.4)  | 464 (15.6)   |  |
| Roads                   | 35,939 (81.7)        | 19,360 (75.4)  | 5,281 (78.1)  | 11,298 (97.5) | 14,632 (34.3)      | 9,963 (38.9)  | 1,915 (28.7)  | 2,754 (26.5) |  |
| Railways                | 6,732 (96.8)         | 5,695 (96.3)   | 342 (99.8)    | 694 (99.2)    | 3,423 (49.5)       | 2,708 (45.8)  | 227 (66.5)    | 488 (73.1)   |  |
| Airports                | 239 (62.6)           | 68 (64.2)      | 168 (61.5)    | 3 (100)       | 125 (34.9)         | 43 (42.2)     | 82 (32.3)     | 0 (0)        |  |
| Pipelines               | 7,699 (81.2)         | 6,913 (94.8)   | 785 (35.8)    | 1 (100)       | 3,759 (39.8)       | 3,258 (44.8)  | 501 (23.1)    | 0 (0)        |  |
| Industrial areas        | 126.4 (65.1)         | 123.3 (72.1)   | 2.6 (11.7)    | 0.5 (53.4)    | 57.6 (30.6)        | 55.3 (33.3)   | 2.2 (10.5)    | <0.1 (0.1)   |  |
| <b>RCP2.6 2061–2080</b> |                      |                |               |               |                    |               |               |              |  |
| Settl./>5,000 inh.      | 1,174/39 (67.0/78.0) | 771 (65.3)     | 167 (57.0)    | 236 (85.2)    | 571/22 (34.6/44.0) | 438 (37.5)    | 74 (27.8)     | 59 (27.3)    |  |
| Buildings               | 92,771 (74.0)        | 85,947 (78.1)  | 3,904 (32.1)  | 2,920 (92.5)  | 33,941 (27.6)      | 31,531 (28.9) | 2,034 (19.0)  | 376 (12.6)   |  |
| Roads                   | 30,855 (70.1)        | 16,370 (63.8)  | 4,557 (67.4)  | 9,927 (85.7)  | 12,515 (29.3)      | 8,578 (33.5)  | 1,598 (23.9)  | 2,339 (22.5) |  |
| Railways                | 5,771 (83.0)         | 4,851 (82.1)   | 341 (99.5)    | 579 (82.8)    | 2,977 (43.0)       | 2,357 (39.9)  | 227 (66.5)    | 393 (58.9)   |  |
| Airports                | 206 (53.9)           | 55 (51.9)      | 149 (54.6)    | 2 (66.7)      | 104 (29.1)         | 35 (34.3)     | 69 (27.2)     | 0 (0)        |  |
| Pipelines               | 6,139 (64.7)         | 5,420 (74.3)   | 718 (32.8)    | 1 (100)       | 2,838 (30.1)       | 2,556 (35.1)  | 282 (13.0)    | 0 (0)        |  |
| Industrial areas        | 85.2 (43.9)          | 83.4 (48.8)    | 1.4 (6.5)     | 0.4 (41.3)    | 45.5 (24.2)        | 44.2 (26.6)   | 1.4 (6.4)     | <0.1 (0.1)   |  |
| <b>RCP4.5 2061–2080</b> |                      |                |               |               |                    |               |               |              |  |
| Settl./>5,000 inh.      | 1,342/44 (76.6/88.0) | 891 (75.4)     | 188 (64.2)    | 263 (94.9)    | 663/23 (40.2/46.0) | 517 (44.3)    | 80 (30.1)     | 66 (30.6)    |  |
| Buildings               | 106,332 (84.9)       | 96,931 (88.1)  | 6,302 (51.9)  | 3,099 (98.1)  | 39,816 (32.4)      | 36,314 (33.2) | 3,039 (28.4)  | 463 (15.6)   |  |
| Roads                   | 35,775 (81.3)        | 19,253 (75.0)  | 5,242 (77.5)  | 11,280 (97.3) | 14,573 (34.1)      | 9,896 (38.6)  | 1,923 (28.8)  | 2,755 (26.5) |  |
| Railways                | 6,687 (96.2)         | 5,652 (95.6)   | 341 (99.6)    | 694 (99.2)    | 3,391 (49.0)       | 2,676 (45.3)  | 227 (66.5)    | 488 (73.1)   |  |
| Airports                | 240 (62.8)           | 70 (66.0)      | 167 (61.2)    | 3 (100)       | 127 (35.5)         | 45 (44.1)     | 82 (32.3)     | 0 (0)        |  |
| Pipelines               | 7,690 (81.1)         | 6,904 (94.7)   | 785 (35.8)    | 1 (100)       | 3,845 (40.7)       | 3,260 (44.8)  | 586 (27.0)    | 0 (0)        |  |
| Industrial areas        | 124.5 (64.1)         | 121.5 (71.0)   | 2.5 (11.5)    | 0.5 (53.4)    | 56.2 (29.9)        | 53.9 (32.4)   | 2.4 (11.1)    | <0.1 (0.1)   |  |
| <b>RCP8.5 2061–2080</b> |                      |                |               |               |                    |               |               |              |  |
| Settl./>5,000 inh.      | 1,533/47 (87.5/94.0) | 1,030 (87.2)   | 228 (77.8)    | 275 (99.3)    | 830/25 (50.3/50.0) | 662 (56.7)    | 101 (38.0)    | 67 (31.0)    |  |
| Buildings               | 113,619 (90.7)       | 101,881 (92.6) | 8,580 (70.6)  | 3,158 (100)   | 46,249 (37.6)      | 40,892 (37.4) | 4,891 (45.7)  | 466 (15.7)   |  |
| Roads                   | 39,266 (89.2)        | 21,892 (85.3)  | 5,800 (85.8)  | 11,574 (99.9) | 17,359 (40.6)      | 12,158 (47.5) | 2,427 (36.3)  | 2,774 (26.6) |  |
| Railways                | 6,953 (100)          | 5,910 (100)    | 343 (100)     | 700 (100)     | 3,575 (51.7)       | 2,856 (48.4)  | 227 (66.5)    | 492 (73.7)   |  |
| Airports                | 286 (74.9)           | 83 (78.3)      | 200 (73.3)    | 3 (100)       | 173 (48.3)         | 60 (58.8)     | 113 (44.5)    | 0 (0)        |  |
| Pipelines               | 8,178 (86.2)         | 7,275 (99.8)   | 902 (41.2)    | 1 (100)       | 4,900 (51.9)       | 3,441 (47.3)  | 1,459 (67.3)  | 0 (0)        |  |
| Industrial areas        | 171.0 (88.1)         | 160.5 (93.9)   | 9.5 (42.8)    | 1.0 (100)     | 89.5 (47.6)        | 80.0 (48.2)   | 9.5 (44.9)    | <0.1 (0.1)   |  |

Settl = settlements; inh. = inhabitants

Settlements, buildings, and airports = counts; roads, railways, and pipelines = km; Industrial areas = km<sup>2</sup>



**Supplementary Table 3. Numerical results of the proportion (%) and associated uncertainty range of infrastructure in areas of near-surface permafrost thaw and high hazard (determined by a consensus of geohazard indices) based on different Representative Concentration Pathway (RCP) scenarios by 2041–2060 and 2061–2080.** The results are shown for the whole pan-Arctic permafrost area (Arctic) and its extracted subsets of Eurasia, North America and central Asian mountains (Mountains) (Settl = settlements and inh. = inhabitants).

| Infrastructure     | Thaw            |                 |                 |                 | High hazard          |                 |                 |                 |
|--------------------|-----------------|-----------------|-----------------|-----------------|----------------------|-----------------|-----------------|-----------------|
|                    | Arctic          | Eurasia         | North-America   | Mountains       | Arctic               | Eurasia         | North-America   | Mountains       |
| Settl./>5,000 inh. | 66.0(78.0-46.0) | 63.9(47.8-73.7) | 55.3(38.9-64.2) | 85.9(46.2-94.9) | 33.7/44.0(21.3-48.0) | 36.6(24.4-51.2) | 26.3(18.4-47.7) | 27.3(8.3-30.6)  |
| Buildings          | 72.4(61.7-82.1) | 76.3(65.9-85.8) | 32.1(23.6-44.8) | 92.4(60.9-98.3) | 26.2(17.6-51.6)      | 27.4(18.4-46.1) | 18.4(13.7-35.3) | 12.5(4.0-15.7)  |
| Roads              | 68.6(42.9-80.8) | 61.8(43.1-74.4) | 65.0(43.2-76.7) | 85.9(42.3-97.1) | 28.4(16.2-40.5)      | 32.1(20.5-45.4) | 23.1(13.7-42.2) | 22.6(7.4-27.3)  |
| Railways           | 82.4(59.9-94.4) | 81.3(64.2-93.5) | 99.4(63.1-99.5) | 83.0(22.6-99.6) | 42.7(29.2-58.3)      | 39.5(30.6-55.9) | 66.3(30.2-70.2) | 59.0(15.6-73.8) |
| Airports           | 51.8(35.6-61.5) | 49.1(34.0-60.4) | 52.7(36.3-61.5) | 66.7(33.3-100)  | 27.7(17.0-44.7)      | 32.4(18.6-53.9) | 26.0(16.5-41.3) | 0(0-0)          |
| Pipelines          | 62.4(41.9-80.6) | 71.8(48.5-94.2) | 31.3(19.8-35.6) | 100(100-100)    | 28.6(19.0-57.1)      | 33.3(22.2-65.3) | 13.0(8.4-29.8)  | 0(0-0)          |
| Industrial areas   | 42.0(30.6-57.0) | 46.5(34.1-62.9) | 6.6(4.4-11.6)   | 53.4(30.2-97.6) | 23.9(15.5-51.4)      | 26.2(17.1-56.1) | 6.4(4.0-17.2)   | 0.1(0.1-0.1)    |
| Settl./>5,000 inh. | 71.2(78.0-58.2) | 68.8(59.3-77.6) | 60.4(46.8-68.3) | 92.4(65.7-96.4) | 36.9/44.0(23.2-52.3) | 39.8(32.9-56.0) | 28.9(22.9-53.4) | 30.6(17.1-31.0) |
| Buildings          | 76.3(68.1-85.8) | 80.0(72.5-88.5) | 37.1(26.3-38.3) | 96.7(74.9-98.7) | 29.4(22.6-49.4)      | 30.7(23.8-49.9) | 19.3(15.2-53.7) | 15.3(6.6-15.9)  |
| Roads              | 75.8(56.8-83.3) | 69.2(55.5-77.3) | 72.5(57.2-80.4) | 92.4(59.3-98.5) | 31.8(23.0-43.6)      | 35.8(28.2-48.7) | 26.4(19.3-49.4) | 25.4(12.8-27.6) |
| Railways           | 87.4(71.1-98.0) | 85.9(74.3-97.6) | 99.5(80.1-100)  | 93.7(39.3-99.9) | 44.8(35.5-60.8)      | 40.9(35.9-58.7) | 66.5(47.0-71.3) | 68.3(26.4-74.2) |
| Airports           | 57.6(45.5-66.2) | 56.6(44.3-67.9) | 57.5(45.8-65.2) | 100(66.7-100)   | 31.0(23.7-51.7)      | 37.3(28.4-62.7) | 28.7(22.0-47.6) | 0(0-0)          |
| Pipelines          | 69.2(53.9-82.4) | 79.6(61.9-96.1) | 34.3(27.1-36.6) | 100(100-100)    | 32.4(23.8-69.6)      | 38.1(27.4-72.8) | 13.3(11.8-58.9) | 0(0-0)          |
| Industrial areas   | 48.2(36.9-65.4) | 53.3(41.1-71.7) | 8.6(4.9-15.1)   | 53.4(30.2-97.6) | 24.8(20.1-64.4)      | 27.1(22.2-67.4) | 7.9(4.3-44.4)   | 0.1(0.1-0.1)    |
| Settl./>5,000 inh. | 77.2(88.0-68.1) | 76.0(68.2-82.4) | 65.2(56.0-75.1) | 94.9(80.9-98.6) | 40.3/46.0(34.6-58.3) | 44.4(38.5-62.4) | 30.5(26.7-62.4) | 30.6(23.1-31.0) |
| Buildings          | 85.2(75.9-88.9) | 88.2(80.5-90.5) | 54.8(30.8-72.3) | 98.2(88.8-99.3) | 32.4(27.4-52.1)      | 33.3(28.7-52.2) | 28.4(18.7-60.9) | 15.6(10.9-16.0) |
| Roads              | 81.7(71.3-86.7) | 75.4(69.1-81.7) | 78.1(67.2-83.7) | 97.5(78.6-99.6) | 34.3(29.6-48.9)      | 38.9(33.4-53.8) | 28.7(23.2-63.0) | 26.5(19.6-27.8) |
| Railways           | 96.8(84.1-99.9) | 96.3(84.9-99.9) | 99.8(99.5-100)  | 99.2(69.3-100)  | 49.5(42.2-62.3)      | 45.8(40.1-60.2) | 66.5(66.5-75.1) | 73.1(48.5-74.5) |
| Airports           | 62.6(54.2-71.5) | 64.2(55.7-74.5) | 61.5(53.5-70.0) | 100(66.7-100)   | 34.9(28.2-63.7)      | 42.2(36.3-73.5) | 32.3(25.2-60.2) | 0(0-0)          |
| Pipelines          | 81.2(68.4-84.2) | 94.8(79.3-98.1) | 35.8(32.5-38.1) | 100(100-100)    | 39.8(30.9-76.0)      | 44.8(36.3-75.7) | 23.1(12.9-77.0) | 0(0-0)          |
| Industrial areas   | 65.1(48.0-80.3) | 72.1(53.5-85.4) | 11.7(6.0-39.2)  | 53.4(31.6-100)  | 30.6(23.4-76.8)      | 33.3(23.9-77.6) | 10.5(5.4-74.6)  | 0.1(0.1-0.1)    |
| Settl./>5,000 inh. | 67.0(78.0-48.4) | 65.3(51.1-74.3) | 57.0(41.3-65.2) | 85.2(44.4-94.9) | 34.6/44.0(23.2-48.8) | 37.5(26.9-52.3) | 27.8(19.2-48.5) | 27.3(7.9-30.6)  |
| Buildings          | 74.0(64.3-83.1) | 78.1(68.9-86.7) | 32.1(23.9-46.1) | 92.5(60.4-98.2) | 27.6(19.7-45.6)      | 28.9(20.7-47.2) | 19.0(14.0-36.8) | 12.6(3.7-15.7)  |
| Roads              | 70.1(45.6-81.3) | 63.8(46.6-75.0) | 67.4(48.7-77.6) | 85.7(41.6-97.4) | 29.3(17.7-41.6)      | 33.5(22.5-46.7) | 23.9(15.6-44.2) | 22.5(7.1-27.3)  |
| Railways           | 83.0(62.6-95.1) | 82.1(67.3-94.3) | 99.5(64.6-99.6) | 82.8(21.8-99.6) | 43.0(31.0-58.9)      | 39.9(32.8-56.6) | 66.5(31.7-70.4) | 58.9(14.8-73.8) |
| Airports           | 53.9(38.5-62.8) | 51.9(35.8-61.3) | 54.6(39.6-63.0) | 66.7(33.3-100)  | 29.1(19.0-45.3)      | 34.3(20.6-55.9) | 27.2(18.5-41.3) | 0(0-0)          |
| Pipelines          | 64.7(46.7-81.4) | 74.3(53.8-95.1) | 32.8(22.8-36.0) | 100(100-100)    | 30.1(20.4-63.4)      | 35.1(23.6-70.9) | 13.0(9.8-38.0)  | 0(0-0)          |
| Industrial areas   | 43.9(33.2-60.0) | 48.8(37.0-66.3) | 6.5(4.8-11.6)   | 41.3(9.3-53.4)  | 24.2(16.9-56.6)      | 26.6(18.7-61.0) | 6.4(4.2-25.2)   | 0.1(0.1-0.1)    |
| Settl./>5,000 inh. | 76.6(88.0-68.0) | 75.4(67.8-82.0) | 64.2(55.3-75.4) | 94.9(81.9-98.6) | 40.2/46.0(34.6-58.1) | 44.3(38.3-62.3) | 30.1(26.7-61.7) | 30.6(24.1-31.0) |
| Buildings          | 84.9(75.0-89.1) | 88.1(79.5-90.3) | 51.9(30.3-75.5) | 98.1(89.1-99.3) | 32.4(27.3-52.1)      | 33.2(28.6-52.2) | 28.4(18.7-62.0) | 15.6(11.4-16.0) |
| Roads              | 81.3(70.7-86.5) | 75.0(68.3-81.3) | 77.5(66.2-83.5) | 97.3(78.7-99.6) | 34.1(29.4-48.4)      | 38.6(35.0-53.5) | 28.8(23.0-60.9) | 26.5(19.8-27.8) |
| Railways           | 96.2(83.3-99.9) | 95.6(83.9-99.9) | 99.6(99.5-100)  | 99.2(69.6-100)  | 49.0(41.7-62.3)      | 45.3(39.5-60.2) | 66.5(66.5-74.8) | 73.1(48.7-74.5) |
| Airports           | 62.8(53.7-72.0) | 66.0(54.7-74.5) | 61.2(53.1-70.7) | 100(66.7-100)   | 35.5(27.9-62.6)      | 44.1(35.3-73.5) | 32.3(25.2-58.7) | 0(0-0)          |
| Pipelines          | 81.1(66.3-84.1) | 94.7(76.6-98.0) | 35.8(32.3-37.6) | 100(100-100)    | 40.7(29.6-75.8)      | 44.8(34.7-75.7) | 27.0(12.9-76.3) | 0(0-0)          |
| Industrial areas   | 64.1(46.4-79.7) | 71.0(51.7-85.2) | 11.5(6.0-36.3)  | 53.4(31.6-100)  | 29.9(23.2-76.2)      | 32.4(25.6-77.3) | 11.1(5.4-71.0)  | 0.1(0.1-0.1)    |
| Settl./>5,000 inh. | 87.5(94.0-80.8) | 87.2(80.6-94.2) | 77.8(67.9-87.4) | 99.3(95.3-100)  | 50.3/50.0(41.5-71.8) | 56.7(46.1-76.5) | 38.0(30.1-84.2) | 31.0(30.6-31.0) |
| Buildings          | 90.7(86.4-95.2) | 92.6(89.4-95.9) | 70.6(56.6-88.3) | 100(98.0-100)   | 37.6(32.0-61.4)      | 37.4(32.7-59.9) | 45.7(29.7-89.4) | 15.7(15.3-16.0) |
| Roads              | 89.2(84.1-93.0) | 85.3(79.4-89.4) | 85.8(79.9-94.8) | 99.9(96.8-100)  | 40.6(35.1-61.8)      | 47.5(40.8-67.7) | 36.3(27.0-92.2) | 26.6(26.0-27.8) |
| Railways           | 100(99.4-100)   | 100(99.7-100)   | 100(99.8-100)   | 100(96.3-100)   | 51.7(50.7-63.8)      | 48.4(47.5-60.9) | 66.5(66.5-91.4) | 73.7(71.0-74.5) |
| Airports           | 74.9(66.0-86.4) | 78.3(71.7-87.7) | 73.3(63.4-85.7) | 100(100-100)    | 48.3(33.8-85.8)      | 58.8(45.1-84.3) | 44.5(29.5-87.0) | 0(0-0)          |
| Pipelines          | 86.2(83.2-96.1) | 99.8(97.2-99.9) | 41.2(36.7-83.2) | 100(100-100)    | 51.9(37.9-84.8)      | 47.3(45.3-81.5) | 67.3(12.9-96.2) | 0(0-0)          |
| Industrial areas   | 88.1(73.1-94.2) | 93.9(81.1-94.8) | 42.8(12.1-89.3) | 100(53.4-100)   | 47.6(34.1-87.0)      | 48.2(37.5-86.4) | 44.9(9.2-95.7)  | 0.1(0.1-0.1)    |
