# Supplementary material for: Degrading permafrost puts Arctic infrastructure at risk by mid-century
Source: PubMed Central journal article supplement (PMC6289964; doi:10.1038/s41467-018-07557-4), 2018-12-11
Supplement: 41467_2018_7557_MOESM3_ESM.pdf [file 41467_2018_7557_MOESM3_ESM.pdf]

## Description of Additional Supplementary File

**Supplementary Data 1.** Numerical results of the infrastructure computations using a consensus of geohazard indices ( $I_c$ ) for periods 2041–2060 and 2061–2080 under three Representative Concentration Pathways (RCPs). The results are shown for the whole pan-Arctic permafrost area (Arctic) and its extracted subsets of Eurasia, North America and central Asian mountains (Mountains). Proportion (%) of infrastructure in areas of near-surface permafrost thaw and hazard class appear in brackets. The areal coverage of  $I_c$  is slightly smaller than that of modelled permafrost owing to the patchiness of sediment data in certain high-Arctic areas with thin overburden.
